# Supplementary material for: Seroprevalence of Diphtheria and Tetanus Immunoglobulin G among the General Health Population in Guangzhou, China
Source: MDPI journal article supplement (doi:10.3390/vaccines12040381), 2024-04-04
Supplement: s1 [file s1]

**Supplemental Table S1.** The diphtheria and tetanus toxoid IgG-specific antibody levels by doses and sex.

| Doses | No. (%)    |            | Diphtheria GMC (IU/ml, 95%CI) |                    | P     | Tetanus GMC (IU/ml, 95%CI) |                    | P     |
|-------|------------|------------|-------------------------------|--------------------|-------|----------------------------|--------------------|-------|
|       | Female     | Male       | Female                        | Male               |       | Female                     | Male               |       |
| 0     | 1(0.39)    | 6(1.96)    | -                             | 0.023(0.007,0.078) | <0.05 | -                          | 0.01(0.002,0.042)  | >0.05 |
| 1     | 6(2.34)    | 3(0.98)    | 0.096(0.031,0.294)            | 0.097(0.006,1.631) | >0.05 | 0.121(0.014,1.044)         | 0.499(0.085,2.919) | >0.05 |
| 2     | 4(1.56)    | 4(1.31)    | 0.021(0.001,0.362)            | 0.18(0.064,0.502)  | >0.05 | 0.033(0.001,1.728)         | 0.387(0.114,1.312) | >0.05 |
| 3     | 46(17.97)  | 35(11.44)  | 0.137(0.101,0.187)            | 0.128(0.076,0.215) | >0.05 | 0.353(0.234,0.531)         | 0.214(0.12,0.381)  | >0.05 |
| 4     | 136(53.13) | 178(58.17) | 0.125(0.106,0.146)            | 0.202(0.173,0.236) | <0.01 | 0.347(0.275,0.437)         | 0.214(0.12,0.381)  | <0.01 |
| 5     | 63(24.61)  | 80(26.14)  | 0.161(0.13,0.199)             | 0.223(0.175,0.285) | <0.05 | 0.229(0.165,0.319)         | 0.332(0.246,0.45)  | >0.05 |
|       | 256(100)   | 306(100)   |                               |                    |       |                            |                    |       |

**Supplemental Table S2.** The diphtheria toxoid IgG-specific antibody levels by doses and area.

| Doses | No. (%)       |            |                | Diphtheria GMC (IU/ml, 95%CI) |                    |                    | P     |
|-------|---------------|------------|----------------|-------------------------------|--------------------|--------------------|-------|
|       | Central urban | Suburban   | Outer suburban | Central urban                 | Suburban           | Outer suburban     |       |
| 0     | 2(1.11)       | 0(0)       | 5(2.79)        | 0.15 (0,50000)                | -                  | 0.023(0.004,0.117) | >0.05 |
| 1     | 2(1.11)       | 2(0.99)    | 5(2.79)        | 0.102(0,5808430)              | 0.228(0.011,4.595) | 0.067(0.027,0.162) | >0.05 |
| 2     | 0(0)          | 5(2.46)    | 3(1.68)        | -                             | 0.096(0.017,0.558) | 0.03(0,6.121)      | >0.05 |
| 3     | 27(15.00)     | 21(10.34)  | 33(18.44)      | 0.28(0.167,0.469)             | 0.103(0.061,0.175) | 0.085(0.06,0.122)  | <0.01 |
| 4     | 121(67.22)    | 105(51.72) | 88(49.16)      | 0.247(0.204,0.299)            | 0.142(0.123,0.164) | 0.111(0.088,0.14)  | <0.01 |
| 5     | 28(15.56)     | 70(34.48)  | 45(25.14)      | 0.418(0.266,0.658)            | 0.159(0.136,0.188) | 0.161(0.116,0.224) | <0.01 |
|       | 180(100)      | 203(100)   | 179(100)       |                               |                    |                    |       |

**Supplemental Table S3.** The tetanus toxoid IgG-specific antibody levels by doses and area.

| Doses | No. (%)       |            |                | Tetanus GMC (IU/ml, 95%CI) |                    |                    | P     |
|-------|---------------|------------|----------------|----------------------------|--------------------|--------------------|-------|
|       | Central urban | Suburban   | Outer suburban | Central urban              | Suburban           | Outer suburban     |       |
| 0     | 2(1.11)       | 0(0)       | 5(2.79)        | 0.041(0.162,0.897)         | -                  | 0.01(0.002,0.066)  | >0.05 |
| 1     | 2(1.11)       | 2(0.99)    | 5(2.79)        | 0.029(0.547,15)            | 0.029(0.547,15)    | 0.238(0.025,2.247) | >0.05 |
| 2     | 0(0)          | 5(2.46)    | 3(1.68)        |                            | 0.176(0.02,1.521)  | 0.055(0.87,853)    | >0.05 |
| 3     | 27(15.00)     | 21(10.34)  | 33(18.44)      | 0.381(0.239,0.608)         | 0.374(0.232,0.603) | 0.187(0.094,0.372) | >0.05 |
| 4     | 121(67.22)    | 105(51.72) | 88(49.16)      | 0.72(0.594,0.872)          | 0.355(0.285,0.442) | 0.288(0.207,0.401) | <0.01 |
| 5     | 28(15.56)     | 70(34.48)  | 45(25.14)      | 0.269(0.181,0.401)         | 0.319(0.239,0.425) | 0.241(0.145,0.4)   | >0.05 |
|       | 180(100)      | 203(100)   | 179(100)       |                            |                    |                    |       |
